# Supplementary material
Source: publisher figshare collection journal article supplement (https://aacr.figshare.com/articles/dataset/_/22540702)
Supplement: Supplementary file 1 [file 40004053]

# Supplementary Fig. S5

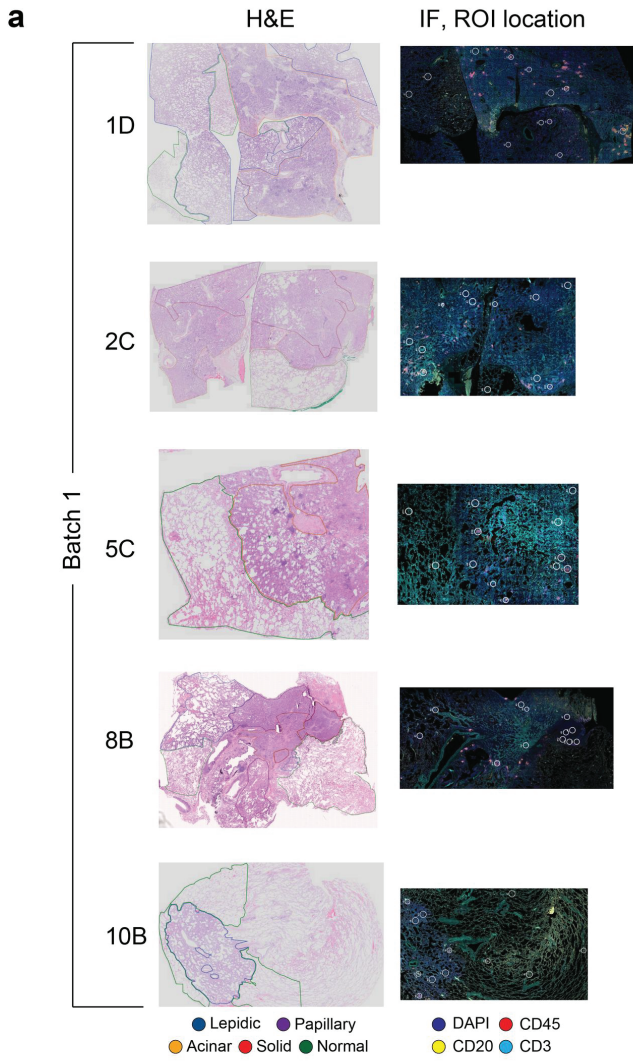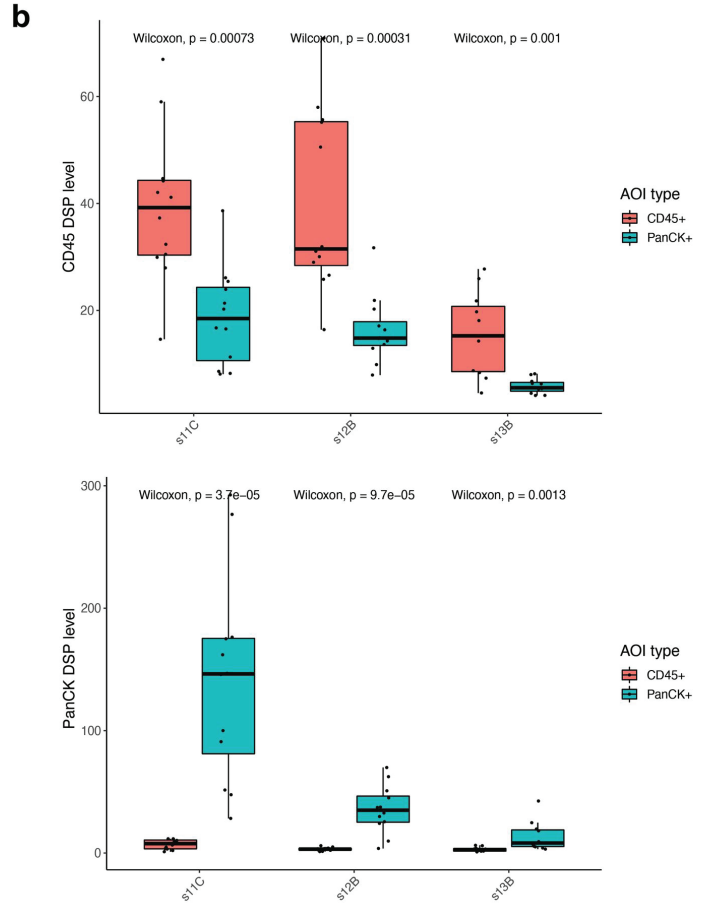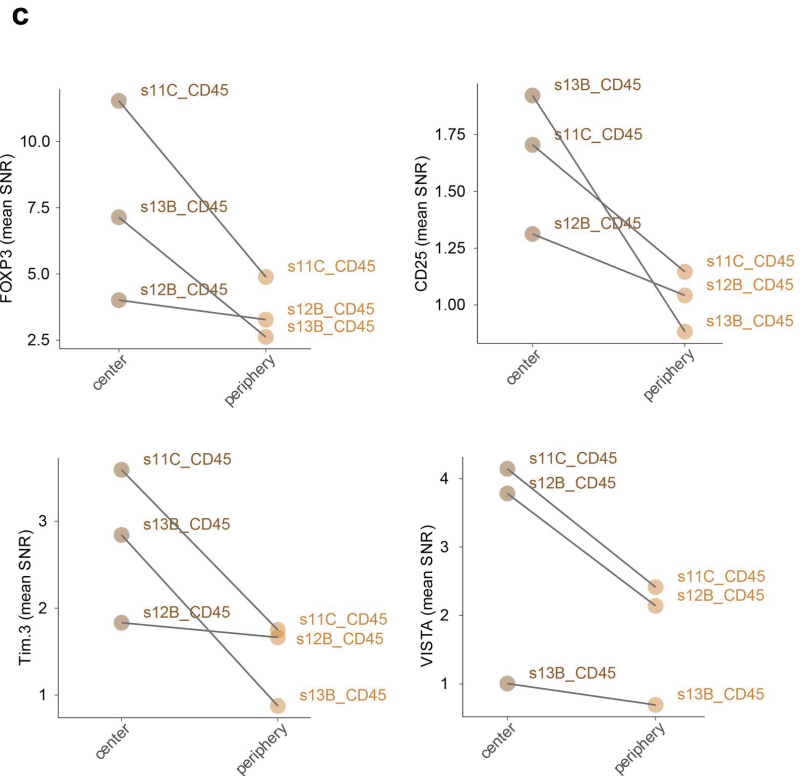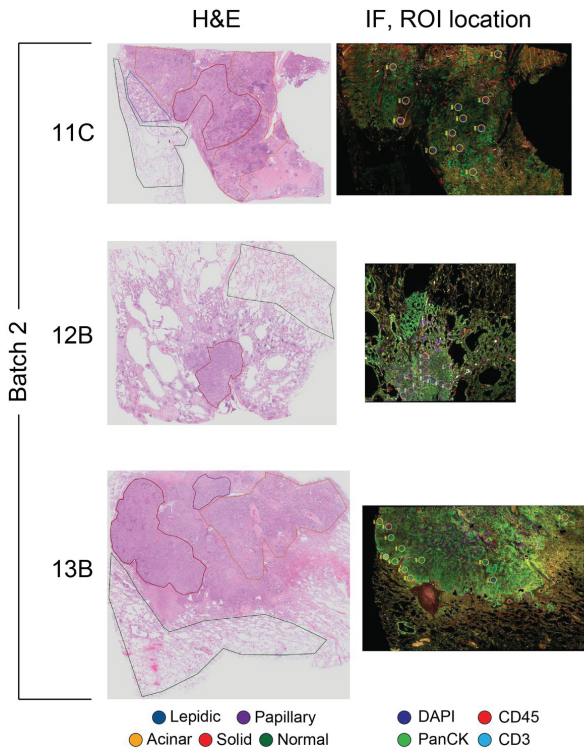

### **Supplementary Fig. S5**

**a)** Snapshots of tumor sections assayed with Digital Spatial Profiling (rows) stained with H&E (first column), and multicolor immunofluorescence (second column). Pattern annotated regions are also reported and color-coded on the H&E images, whereas regions of Interest analyzed with DSP are shown in the IF images (circles).

**b)** Boxplot comparison of CD45 (top) and PanCK (bottom) protein levels measured by DSP in CD45+ masked areas of interest (AOIs, pink) and PanCK+ masked AOIs (blue).

**c)** Mean protein expression values of the labeled protein in CD45+ periphery AOIs (left) vs. CD45+ core AOIs (right) from each of the three patients (mean AOI values from the same patient are connected with a line).
